# Supplementary material for: Prognostic alternative splicing events related splicing factors define the tumor microenvironment and pharmacogenomic landscape in lung adenocarcinoma
Source: publisher site journal article supplement (doi:10.18632/aging.204244), 2022-08-24
Supplement: Supplementary file [file aging-v14i16-204244-supplementary-material-SD1.pdf]

**SUPPLEMENTARY FIGURES**

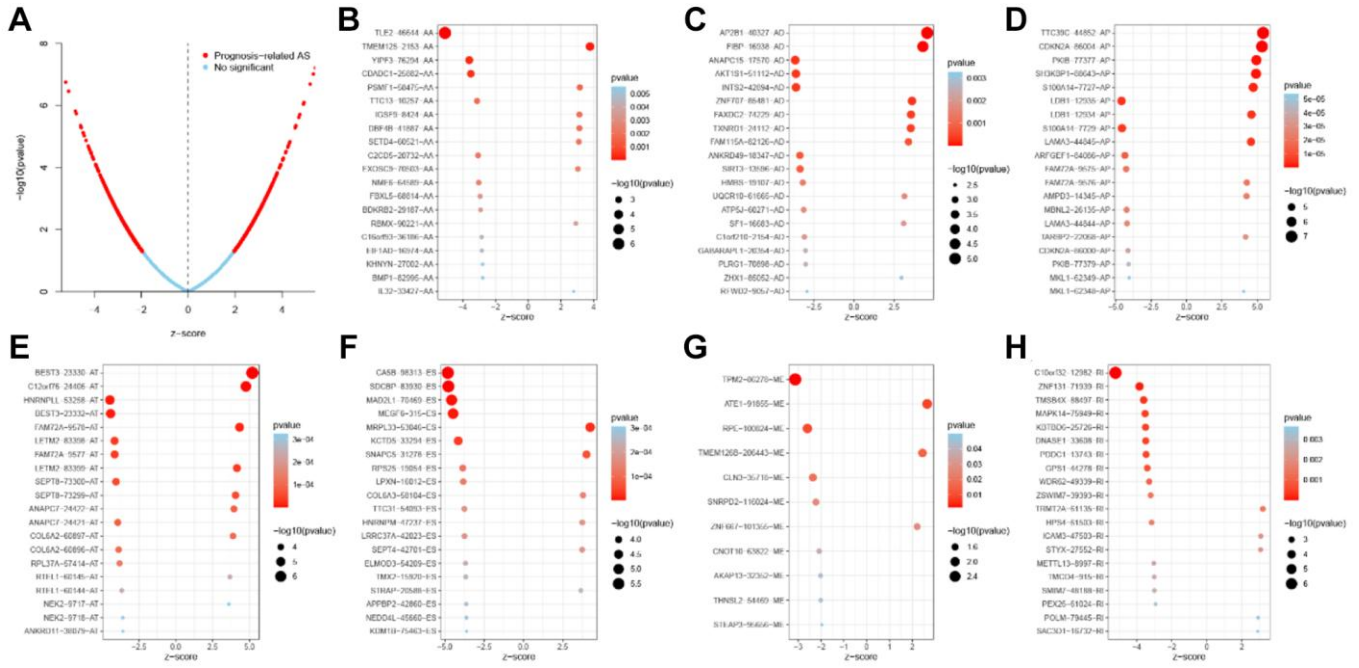

**Supplementary Figure 1. Prognosis-related AS events in LUAD patients. (A)** Prognosis-related AS events distributions in volcano plot. **(B-H)** Top 20 prognosis-related AS events of seven types in forest plot.

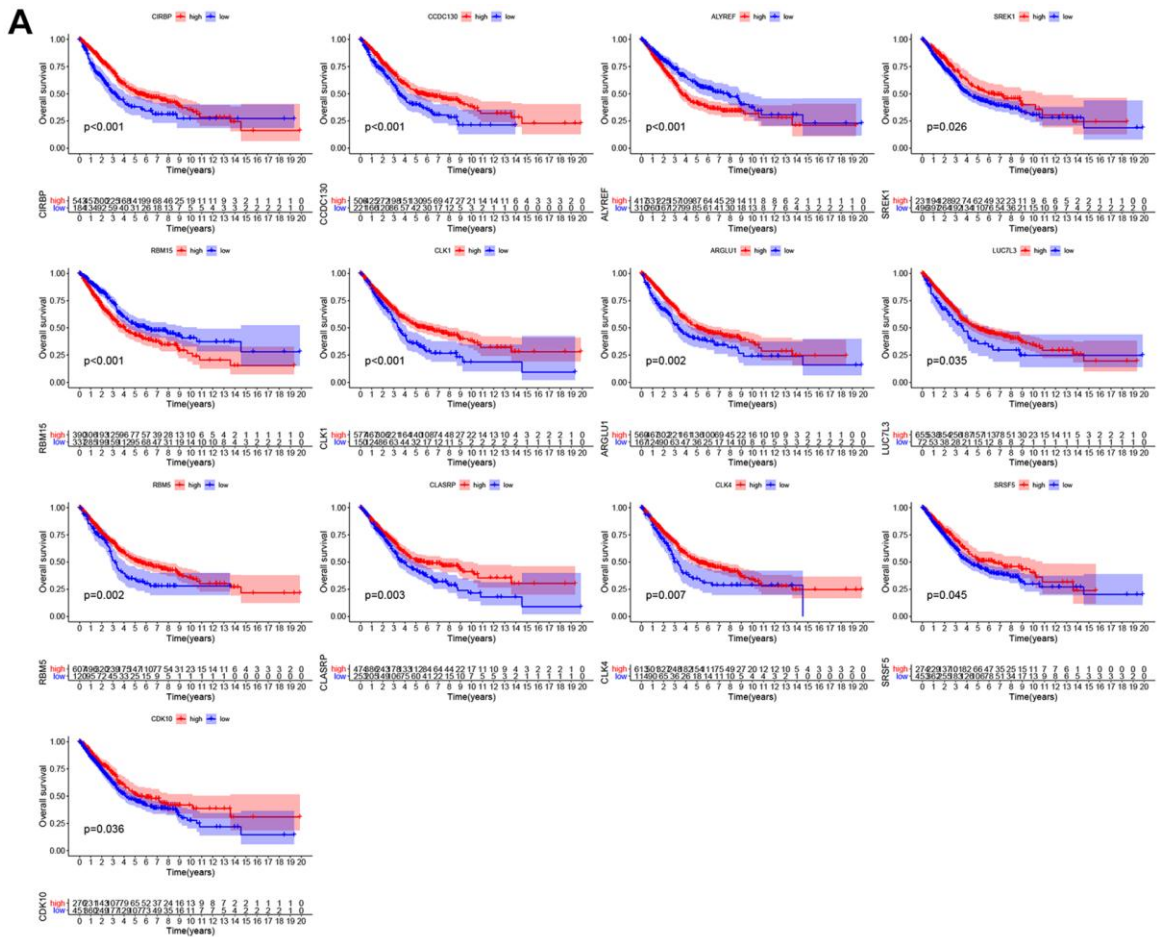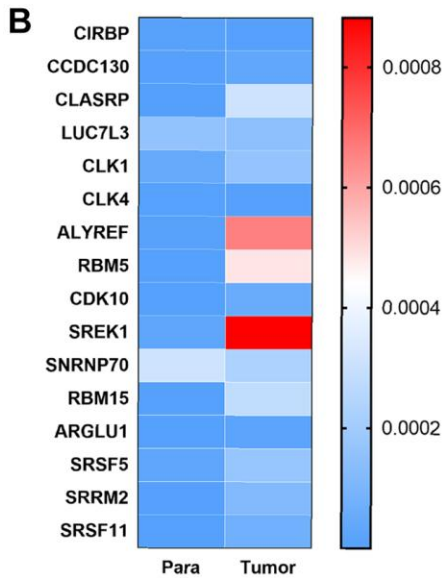

**Supplementary Figure 2. (A)** Kaplan-Meier survival analyses of SFs with prognostic significance; **(B)** expression level of SFs in surgical resected samples.

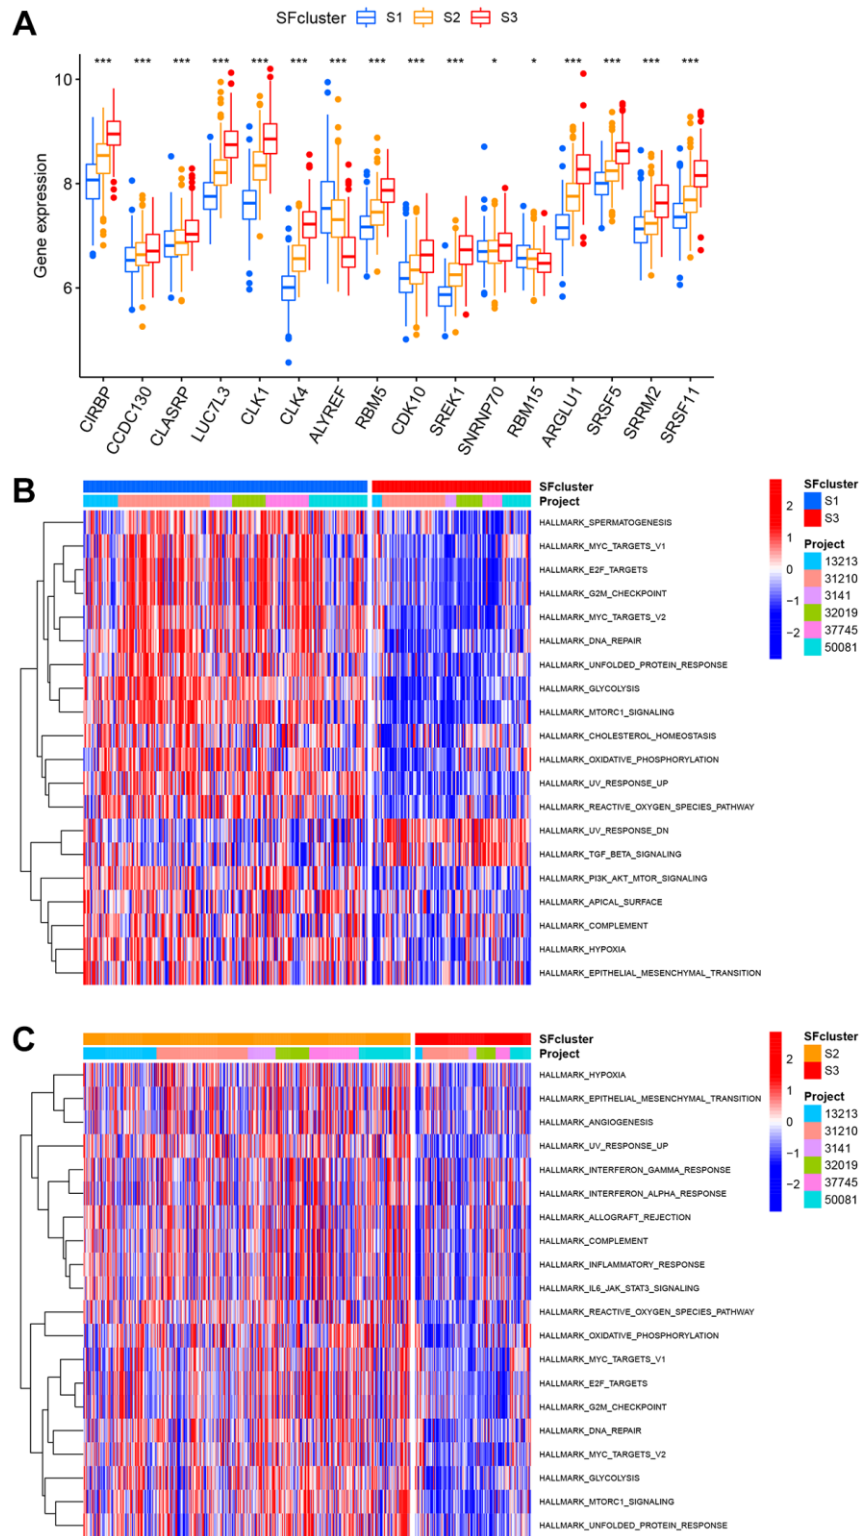

**Supplementary Figure 3.** (A) expression level of SFs in three SFs patterns; GSVA enrichment analyses based on the Hallmark gene set showed the states of biological processes of SFs cluster S1 vs. SFs cluster S3 (B) and SFs cluster S2 vs. SFs cluster S3 (C).

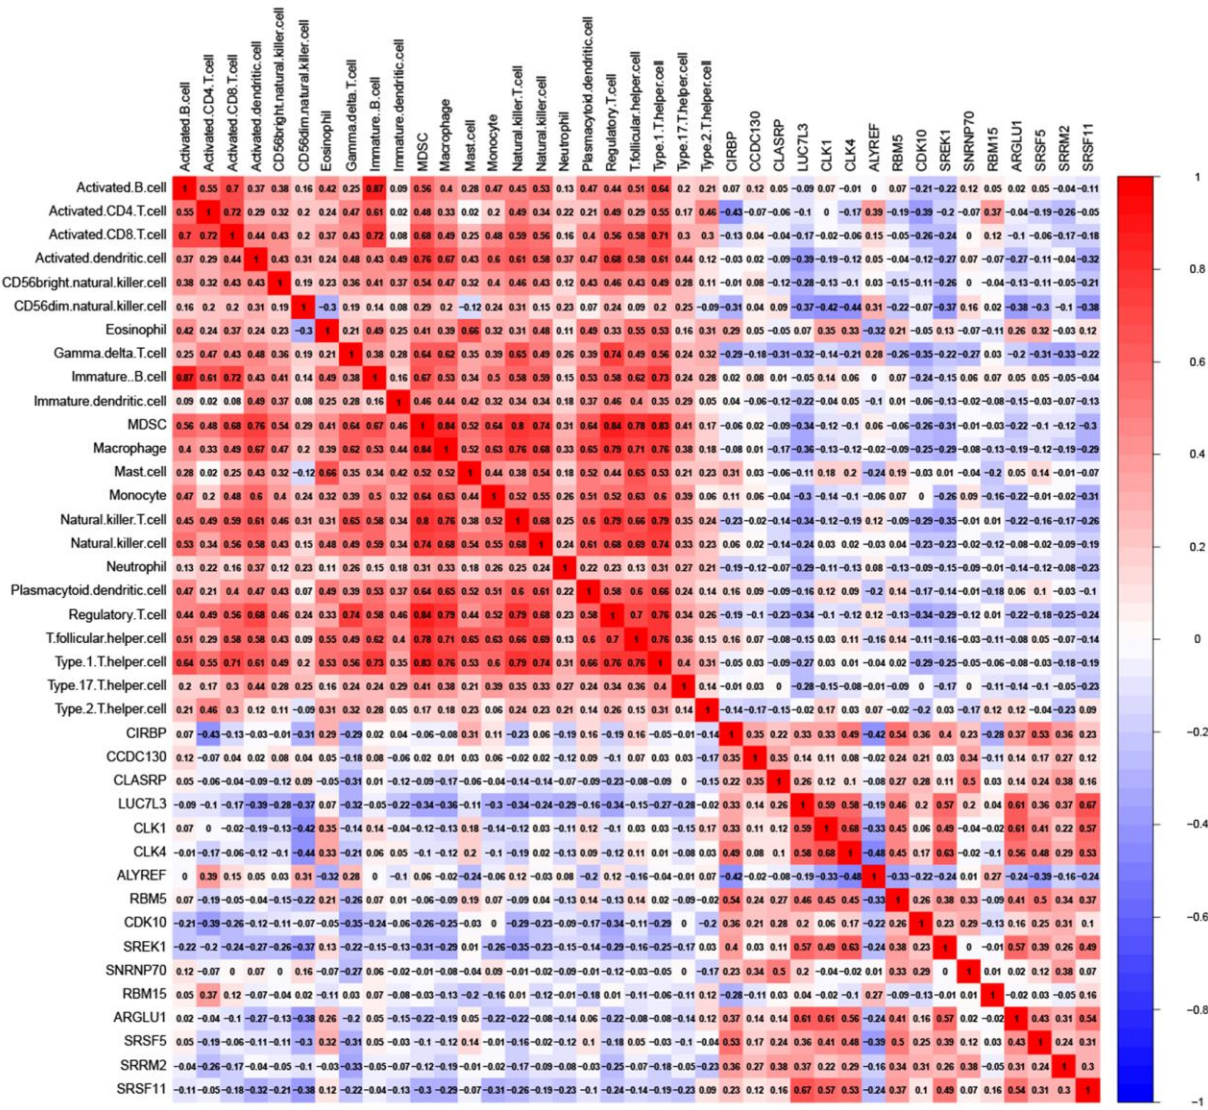

Supplementary Figure 4. Correlations between 16 SFs and 28 TME infiltrating cells in LUAD using spearman analysis.

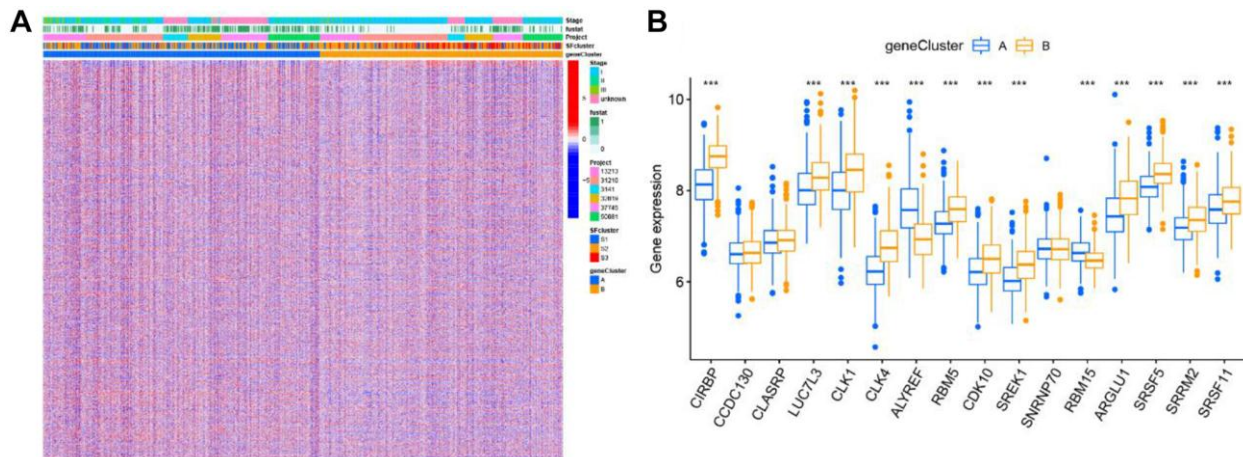

Supplementary Figure 5. (A) Unsupervised clustering of 2959 SFs-related DEGs with prognostic significance in GEO cohorts. (B) The expression level of SFs in two gene clusters.

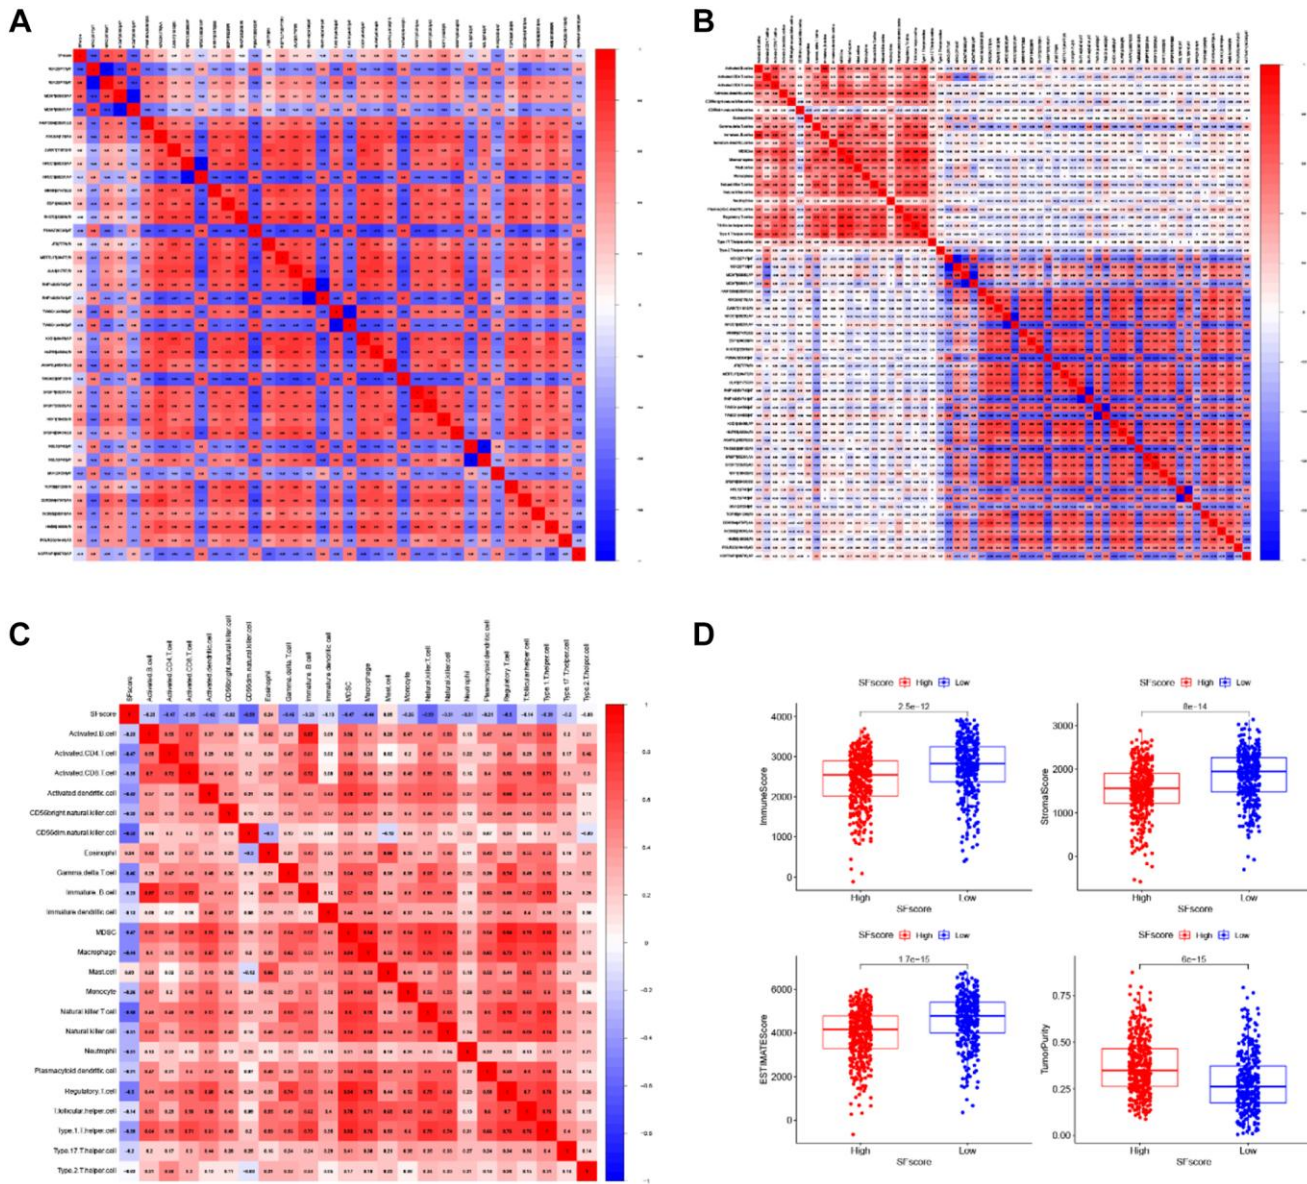

**Supplementary Figure 6.** (A) Correlations between SFscore and SFs interacting AS events. (B) Correlations between SFs interacting AS events and 28 TME infiltrating cells. (C) Correlation analysis between SFscore and TME infiltrating cells. (D) Difference of immune score, stromal score, ESTIMATE score and tumor purity in low/high SFscore groups.
